# Supplementary material for: Efficacy of different interventions for the treatment of postherpetic neuralgia: a Bayesian network meta-analysis
Source: PubMed Central journal article supplement — J Int Med Res. 2020 Dec 14;48(12):0300060520977416. doi: 10.1177/0300060520977416 (PMC7739127; doi:10.1177/0300060520977416), 2020-12-14
Supplement: sj-pdf-1-imr-10.1177_0300060520977416.pdf [file sj-pdf-1-imr-10.1177_0300060520977416.pdf]

**DECLARATION: All the below listed authors agree that they cannot claim authorship to the submitted paper as they do not (or no longer) meet the criteria of the points listed in SECTION TWO.**

List of removed authors. Please sign, indicating your agreement to be removed from the list of registered authors. The individuals listed below will not be credited as authors in the published paper. (Please ask if additional rows are required.)

| Author name | Author signature | Date |
|-------------|------------------|------|
|             |                  |      |
|             |                  |      |
|             |                  |      |
|             |                  |      |
|             |                  |      |
|             |                  |      |
|             |                  |      |
|             |                  |      |
|             |                  |      |
|             |                  |      |
|             |                  |      |
|             |                  |      |
|             |                  |      |
